# Supplementary material for: Phased Offshore CCUS Deployment Framework for Southern China’s High-Economic-Density Coastal Regions
Source: Research Square preprint supplement (doi:10.21203/rs.3.rs-7571556/v1), 2025-10-03
Supplement: Supplementary file 1 [file 4e96efd60ab6a5b467da6d7f.docx]

**Highlights:**

1. A modular two-stage source-sink matching model for offshore CCUS using Minimum Spanning Tree and geographic information system.

2. 2037 is the optimal deployment window for large-scale offshore CCUS in high-economic-density coastal regions.

3. Quantified dominance of transport optimization over capture cost reduction in clustered offshore CCUS economics.

4. Cross-regional "Green Electricity for Storage Rights" mechanism enables wind-CCUS integration.

5. Offshore CCUS can help high-economic-density coastal regions shoulder greater emissions reductions.
