# Supplementary material for: Phased Offshore CCUS Deployment Framework for Southern China’s High-Economic-Density Coastal Regions
Source: Research Square preprint supplement (doi:10.21203/rs.3.rs-7571556/v1), 2025-10-03
Supplement: Supplementary file 2 [file 64274b69046a4bd7e0927f67.docx]

**Supplementary Data for <Phased Offshore CCUS Deployment Framework for Southern China’s High-Economic-Density Coastal Regions >**

Pengfei Xiong 1,2, Shu Jiang 1*, Kai Zhang 2, Zhengbin Wu 2, Cong Cheng 3, Ruyang Yu 4, Linhao Zhang 2, Jiale Fu 2, Xiaoyu Fang 5, Yuhong Xie 6, Tongqing Liu 1

1. State Key Laboratory of Deep Geothermal Resources, China University of Geosciences, Wuhan 430074, China

2. School of Earth Resources, China University of Geosciences, Wuhan, 430074, China

3. Hubei Key Laboratory of Marine Geological Resources, China University of Geosciences, Wuhan, 430074, China

4. College of energy, Chengdu University of Technology, Chengdu, 610000, China

5. Southern Marine Science and Engineering Guangdong Laboratory (Zhanjiang), Zhanjiang, 524088, China

6. China National Offshore Oil Corporation, Beijing, 100028, China

## Contents of This File

- Introduction
- Tables 1 through 6
- References

## Introduction

Tables 1 to 6 present supplementary data for this study. The dataset includes both measurements obtained in this work and data compiled from previous studies, which were subsequently validated and analyzed. For detailed information on the data sources, methodology, and specific content of each table, please refer to the individual table titles and captions below. Detailed data can be obtained in https://www.scidb.cn/en/anonymous/RWJ1SVpi.

Table 1. Globally operating and completed offshore CCUS projects by the end of 2023. After [1](#_ENREF_1) and more dates can be found in <https://netl.doe.gov/carbon-management/carbon-storage/worldwide-ccs-database>.

Table 2. Comparative analysis of CO2 emissions, GDP, population, and carbon emission intensity for 23 cities in 2015, 2019, and 2023. Data for 2023 are derived from this study, based on the Guangdong Statistical Yearbook and Hong Kong and Macao Environmental Bulletins. CO2 emissions for all cities except Hong Kong and Macao were calculated using the methodology and coefficients from [2](#_ENREF_2). Data for 2015 and 2019 are sourced from [3](#_ENREF_3),[4](#_ENREF_4) and the Guangdong Statistical Yearbook (<http://tjnj.gdstats.gov.cn:8080/tjnj/2023/directory/07/html/07-03.htm>).

Table 3. Key parameters for miscible and near-miscible CO2 flooding reservoirs in the Pearl River Mouth and Beibu Gulf basins [5](#_ENREF_5),[6](#_ENREF_6),[7](#_ENREF_7), and the CO2 storage potential of suitable saline aquifer sags (800–3500 m depth) [6](#_ENREF_6),[8](#_ENREF_8). The formula for calculating the minimum miscible pressure of the oil reservoir is:, where is the temperature of reservoir (℃), , is the oil density (g/cm3). The evaluation formula of oil reservoir carbon sequestration potential is: , is the oil density (g/cm3), is the original geological reserves under standard conditions (Sm3), is the volume coefficient of crude oil formation， is the cumulative harvesting efficiency. The evaluation formula of effective storage potential of saline aquifer is , where is the area of the saline aquifer (m²); is the thickness of the saline aquifer (m); is the average porosity of the aquifer; is the density of CO2 at reservoir depth (kg/m³); and is the storage efficiency factor, which corrects for the difference between ideal and effective reservoir conditions, with a value of 0.026 representing average conditions. More explanations of the evaluation formulas and parameters can be referred to [5](#_ENREF_5),[9](#_ENREF_9),[10](#_ENREF_10).

Table 4. Cost and revenue analysis for the entire region and its four sub-regions during the project operational period.

Table 5. Evaluation parameters for CO2 emissions from 17 fossil fuel combustion sources across 47 major industrial sectors in China [2](#_ENREF_2),[3](#_ENREF_3).

Table 6. Major heavy industrial zones and their geographic coordinates for the 23 cities analyzed in this study. The dominant industrial zone in each city was determined based on GDP data from the Guangdong Statistical Yearbook 2023 (<http://tjnj.gdstats.gov.cn:8080/tjnj/2023/directory/07/html/07-03.htm>).

## References

1 Yao, Y., Wang, Y., Xiang, X. & Xie, X. A review of offshore carbon dioxide geological storage from a source-sink perspective. *Renewable and Sustainable Energy Reviews* **222**, 115989, doi:<https://doi.org/10.1016/j.rser.2025.115989> (2025).

2 Liu, Z. *et al.* Reduced carbon emission estimates from fossil fuel combustion and cement production in China. *Nature* **524**, 335-338, doi:10.1038/nature14677 . http://doi.org/10.1038/nature14677 (2015).

3 Zhou, Y., Shan, Y., Liu, G. & Guan, D. Emissions and low-carbon development in Guangdong-Hong Kong-Macao Greater Bay Area cities and their surroundings. *Applied Energy* **228**, 1683-1692, doi:<https://doi.org/10.1016/j.apenergy.2018.07.038> (2018).

4 Global high spatial resolution near real time carbon map, China. https://carbonmonitor.org.cn/ (2015).

5 Li, H., Lau, H. C., Wei, X. & Liu, S. CO2 storage potential in major oil and gas reservoirs in the northern South China Sea. *International Journal of Greenhouse Gas Control* **108**, 103328, doi:<https://doi.org/10.1016/j.ijggc.2021.103328> (2021).

6 Zhou, D., Li, P., Liang, X., Liu, M. & Wang, L. A long-term strategic plan of offshore CO2 transport and storage in northern South China Sea for a low-carbon development in Guangdong province, China. *International Journal of Greenhouse Gas Control* **70**, 76-87, doi:<https://doi.org/10.1016/j.ijggc.2018.01.011> (2018).

7 Hu, Q, M. China Oil and Gas Development History. Vol. 27 ( Petroleum industry press, 2011). https://d.wanfangdata.com.cn/periodical/CiNQZXJpb2RpY2FsQ0hJMjAyNTA1MjIyMDI1MDUyNzE3MTU0NhIPemdzeXNoMjAxMTIxMDEwGghsbXV0NXk2bg== (2012).

8 Research on CCUS Development Planning of Guangdong Province, China. Uk- China(Guangdong) CCUS Centre, Guangzhou, pp. 16-17. http://www.gdccus.org/col.jsp?id=116.

9 Li, P., Zhou, D., Zhang, C. & Chen, G. Assessment of the effective CO2 storage capacity in the Beibuwan Basin, offshore of southwestern P. R. China. *International Journal of Greenhouse Gas Control* **37**, 325-339, doi:<https://doi.org/10.1016/j.ijggc.2015.03.033> (2015).

10 Zhang, K., Lau, H. C., Liu, S. & Li, H. Carbon capture and storage in the coastal region of China between Shanghai and Hainan. *Energy* **247**, 123470, doi:<https://doi.org/10.1016/j.energy.2022.123470> (2022).
